# Supplementary material for: Reversion of resistance to oxaliplatin by inhibition of p38 MAPK in colorectal cancer cell lines: involvement of the calpain / Nox1 pathway
Source: PubMed Central journal article supplement (PMC5732761; doi:10.18632/oncotarget.21780), 2017-10-10
Supplement: oncotarget-08-103710-s001.pdf [file oncotarget-08-103710-s001.pdf]

# Reversion of resistance to oxaliplatin by inhibition of p38 MAPK in colorectal cancer cell lines: Involvement of the calpain / Nox1 pathway

## SUPPLEMENTARY MATERIALS

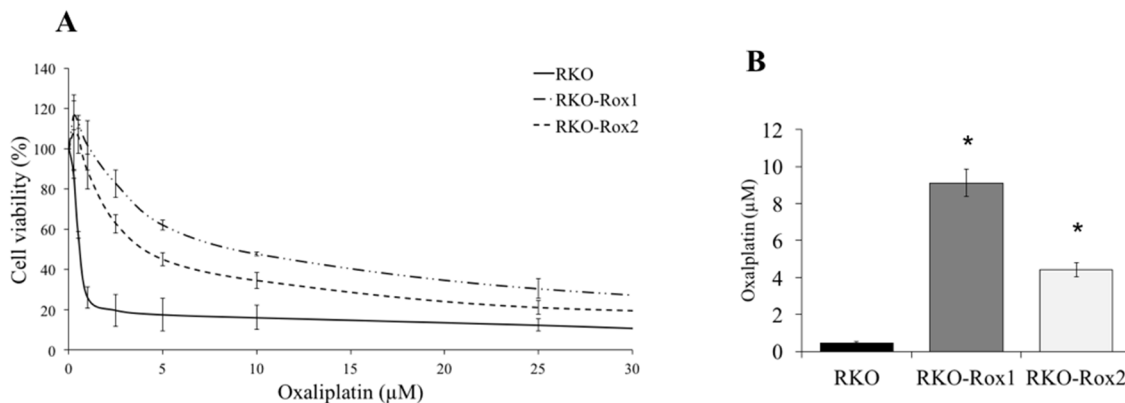

**Supplementary Figure 1: Determination of the resistance status of selected cells.** RKO, RKO-Rox1 (Rox1) and RKO-Rox2 (Rox2) were submitted to 72-hour cytotoxicity assays to oxaliplatin (A). The IC50 were calculated using the Chou and Talalay's method (B). Asterisks indicate a statistical significance with  $p < 0.05$ .

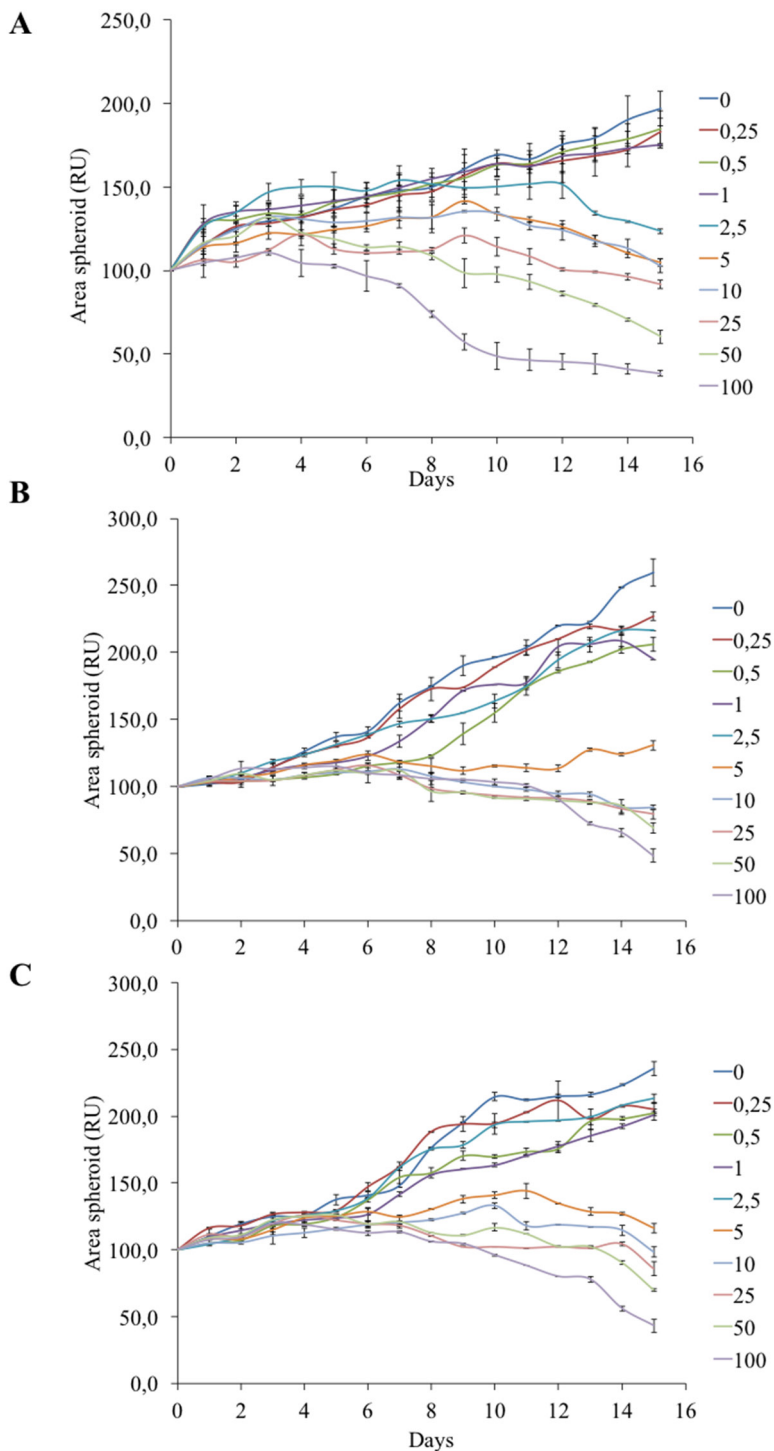

**Supplementary Figure 2 : Evolution of spheroid area during 15-day cytotoxicity assays.** HT29-D4, Rox1 and Rox2 were seeded in 96-well plates in a medium with 20% of methylcellulose. After a 72-hour incubation allowing the spheroid formation, the cells were treated with increasing concentrations of oxaliplatin (from 0.25 μM to 100 μM). The area were measured every two days for HT29-D4 (A), Rox1 (B) and Rox2 (C).

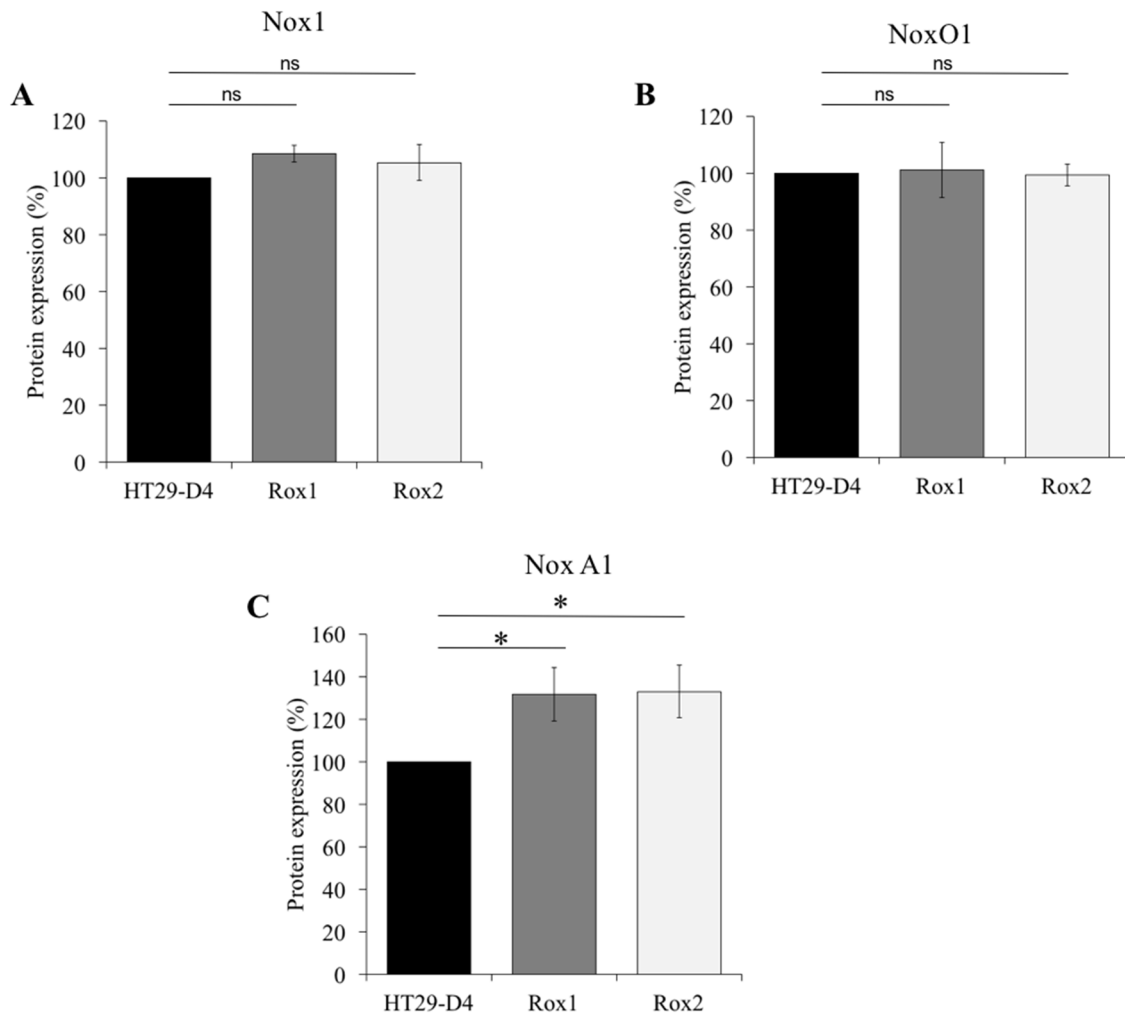

**Supplementary Figure 3 : Expression of the components of Nox1 complex.** The expressions of Nox1 (A), NoxO1 (B) and NoxA1 (C) were quantified from the bands obtained by Western blotting. Asterisks indicate a statistical significance with  $p < 0.05$ .

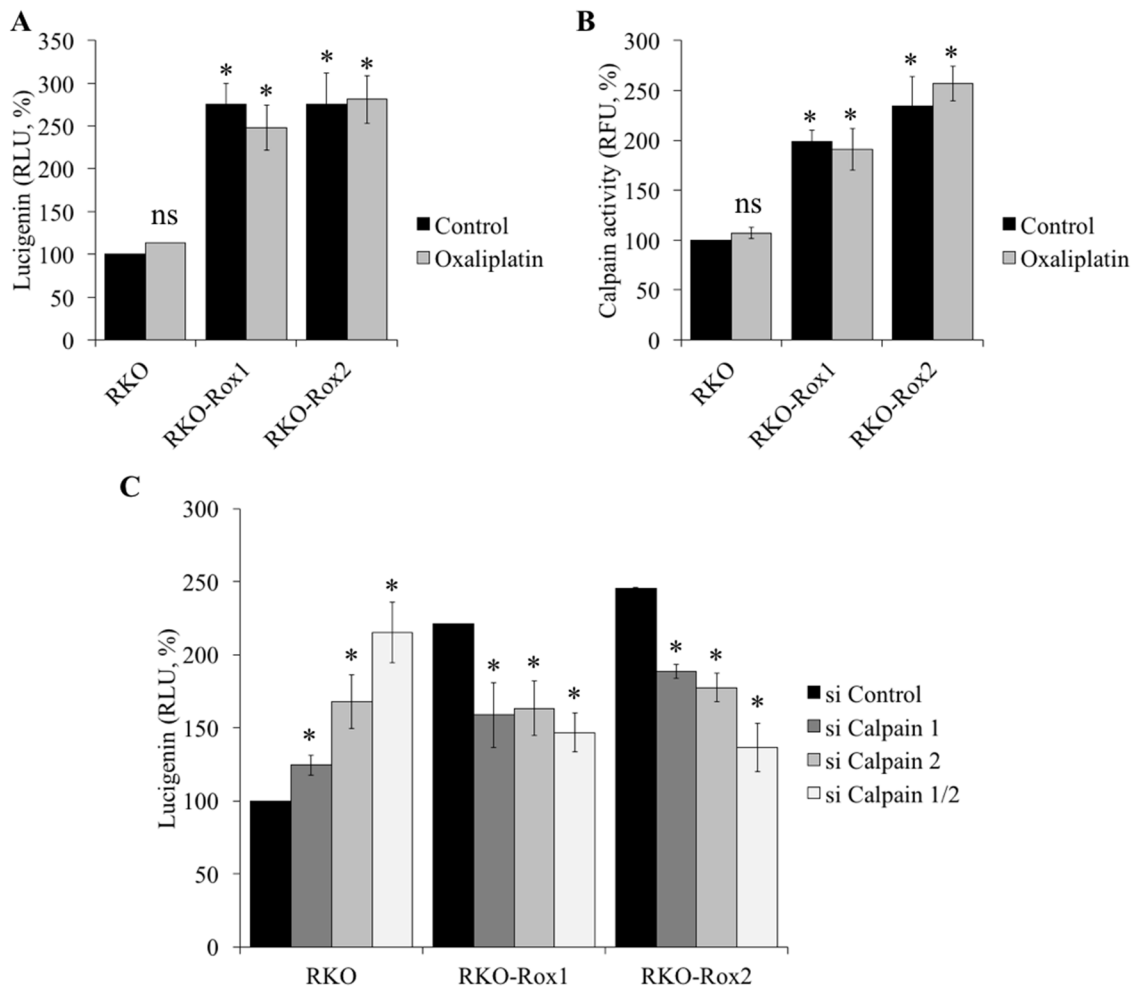

**Supplementary Figure 4 : Sensitive and resistant RKO cells behave as sensitive and resistant HT29-D4.** RKO, RKO-Rox1 and RKO-Rox2 cells were seeded in white 96-well plates to perform lucigenin assays in the absence (Control) or in the presence of oxaliplatin (A). RKO, RKO-Rox1 and RKO-Rox2 cells were seeded in black 96-well plates to perform calpain activity assays in the absence (Control) or in the presence of oxaliplatin (B). RKO, RKO-Rox1 and RKO-Rox2 cells were transfected with control siRNA (si Control), calpain 1 specific siRNA (si Calpain 1), calpain 2 specific siRNA (si Calpain 2) or both siRNAs (si Calpain 1/2). The cells were seeded in white 96-well plates to perform lucigenin assays (C). Asterisks indicate a statistical significance with  $p < 0.05$ .

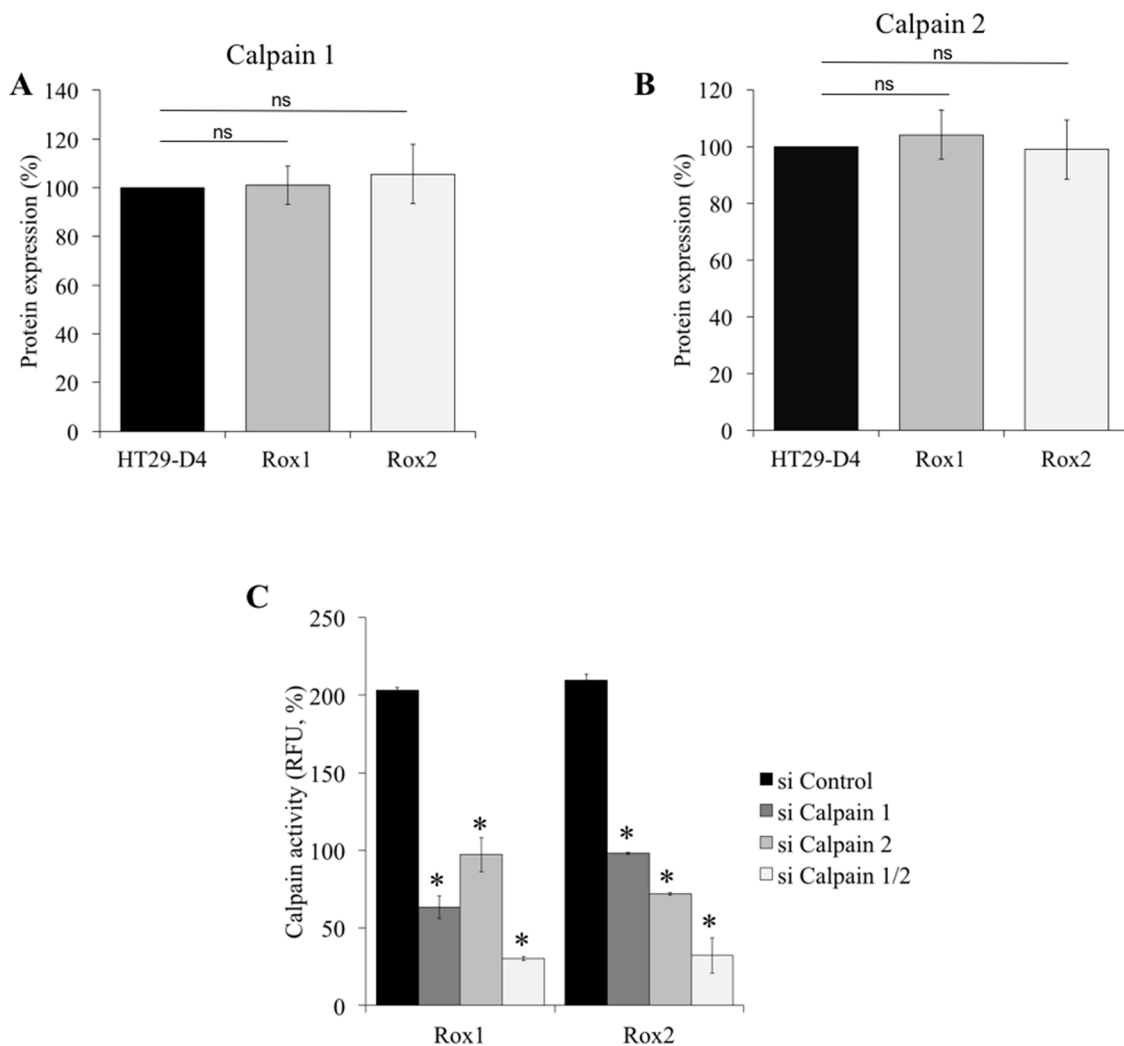

**Supplementary Figure 5: Expression and activity of the ubiquitous calpains.** The expressions of calpain 1 (A) and calpain 2 (B) were quantified from the bands obtained by Western blotting. HT29-D4, Rox1 and Rox2 cells were transfected with control siRNA or with siRNAs directed against calpain 1 and/or calpain 2. The cells were seeded on black 96-well plates and calpain activity was measured using t-boc. The activity was expressed as a percentage (C). Asterisks indicate a statistical significance with  $p < 0.05$ .

**A**

**Cleavage Site Predictions**

Sequence: *NADPH oxidase activator 1 OS=Homo sapiens GN=NOXA1 PE=1 SV=1*

10 Best scores:

1. Pos. **460** - Score: 1.99
2. Pos. **184** - Score: 1.67
3. Pos. **402** - Score: 1.56
4. Pos. **283** - Score: 1.11
5. Pos. **266** - Score: 0.80
6. Pos. **276** - Score: 0.77
7. Pos. **473** - Score: 0.74
8. Pos. **230** - Score: 0.55
9. Pos. **267** - Score: 0.52
10. Pos. **206** - Score: 0.46

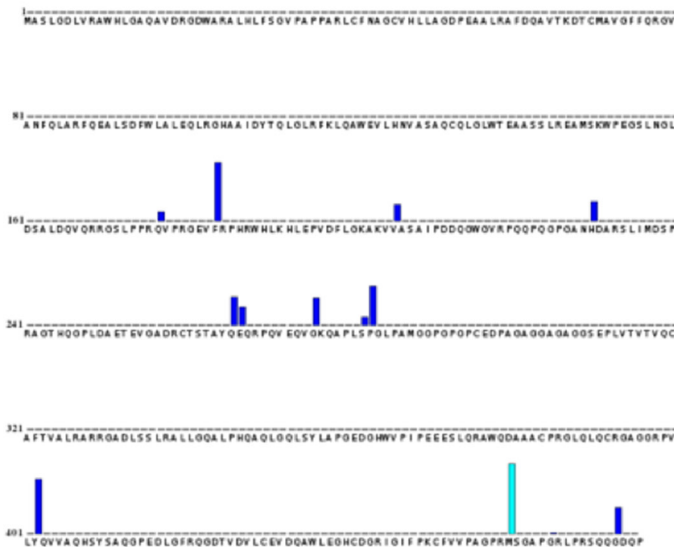

**B**

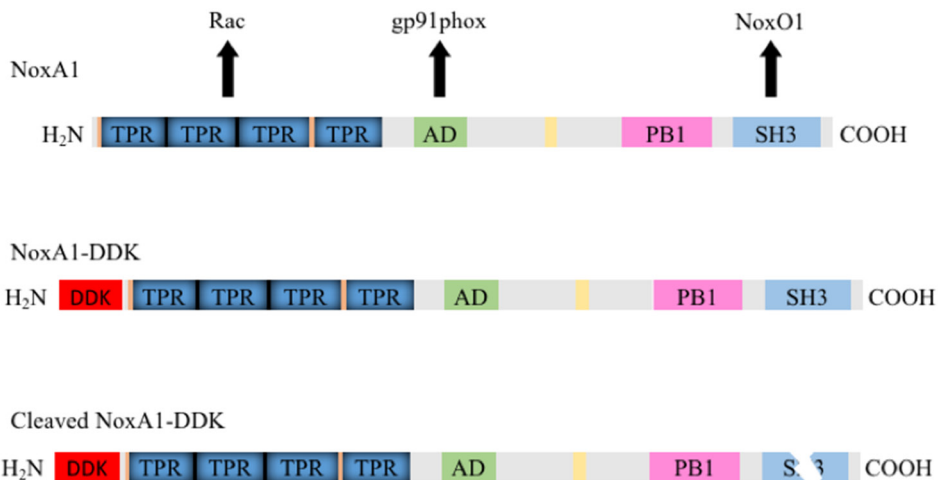

**Supplementary Figure 6: NoxA1 is cleaved by calpains in its C-terminal part.** Calpain cleavage of NoxA1 was predicted using SVM prediction model (on <http://calpain.org/predict.rb?cls=substrate>). The cleavage was predicted to occur at the C-terminal end of NoxA1 (A), in the SH3 domain, known to be involved in the interaction with NoxO1 (B).

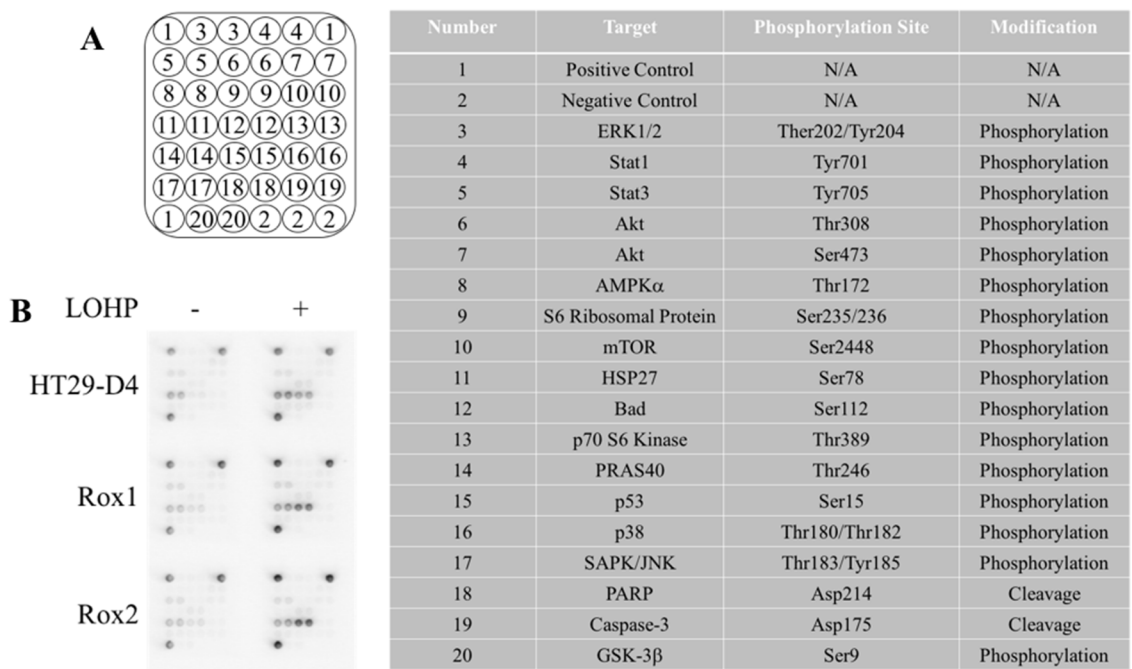

**Supplementary Figure 7: Signaling pathway study using PathScan Array.** Target map of PathScan Array allowing the simultaneous detection of 18 important and well-characterized signaling molecules when phosphorylated or cleaved (A). HT29-D4, Rox1 and Rox2 cells were seeded in 6-well plates and were incubated in the absence or in the presence of oxaliplatin for 24 hours. The cells were then lysed and 37.5  $\mu$ g of cellular proteins were used for the PathScan assay. The raw data were obtained using the G box imaging system (B).

A

| n° | Protein kinase name | Specificity score | Normalized kinase statistic |
|----|---------------------|-------------------|-----------------------------|
| 1  | p38g MAPK (MAPK12)  | 2.7               | 0.42                        |
| 2  | p38b MAPK (MAPK11)  | 2.7               | 0.42                        |
| 3  | p38a MAPK (MAPK14)  | 2.7               | 0.42                        |
| 4  | CHED                | 2.7               | 0.5                         |
| 5  | JNK3 (MAPK10)       | 2.7               | 0.43                        |
| 6  | JNK2 (MAPK9)        | 2.7               | 0.43                        |
| 7  | JNK1 (MAPK8)        | 2.7               | 0.43                        |
| 8  | p38d MAPK (MAPK13)  | 2.5               | 0.39                        |
| 9  | ERK5 (MAPK7)        | 2.4               | 0.4                         |
| 10 | ERK2 (MAPK1)        | 1.7               | 0.36                        |
| 11 | ERK1                | 1.7               | 0.36                        |
| 12 | MAK                 | 1.6               | 0.65                        |
| 13 | CDK3                | 1.4               | 0.41                        |
| 14 | CDK1 (CDC2)         | 1.4               | 0.41                        |
| 15 | ATR                 | 0.8               | 0.34                        |

B

| n° | Protein kinase name | Specificity score | Normalized kinase statistic |
|----|---------------------|-------------------|-----------------------------|
| 1  | p38g MAPK (MAPK12)  | 1.4               | 0.6                         |
| 2  | p38d MAPK (MAPK13)  | 1.4               | 0.57                        |
| 3  | PRKY                | 1.1               | 0.57                        |
| 4  | GSK3A               | 1                 | 0.53                        |
| 5  | NDR2 (KIAA0965)     | 0.9               | 0.57                        |
| 6  | PRKX                | 0.8               | 0.48                        |
| 7  | p70S6Kb (RPS6KB2)   | 0.8               | 0.48                        |
| 8  | DNAPK/PRKDC         | 0.8               | 0.56                        |
| 9  | CHK2 (CHEK2)        | 0.6               | 0.48                        |

C

| n° | Protein kinase name | Specificity score | Normalized kinase statistic |
|----|---------------------|-------------------|-----------------------------|
| 1  | p38d MAPK (MAPK13)  | 2.4               | 0.34                        |
| 2  | p38b MAPK (MAPK11)  | 2.0               | 0.39                        |
| 3  | p38a MAPK (MAPK14)  | 1.8               | 0.41                        |
| 4  | JNK3 (MAPK10)       | 1.8               | 0.39                        |
| 5  | JNK2 (MAPK9)        | 1.8               | 0.39                        |
| 6  | JNK1 (MAPK8)        | 1.8               | 0.39                        |
| 7  | p38g MAPK (MAPK13)  | 1.8               | 0.36                        |
| 8  | ERK5 (MAPK7)        | 1.8               | 0.35                        |
| 9  | ERK1                | 1.6               | 0.29                        |
| 10 | CHED                | 1.5               | 0.46                        |
| 11 | ERK7 (BI916334)     | 1.4               | 0.70                        |
| 12 | ATR                 | 1.4               | 0.41                        |
| 13 | CDK2                | 1.2               | 0.30                        |
| 14 | CDK3                | 1.0               | 0.32                        |
| 15 | CDK1 (CDC2)         | 1.0               | 0.35                        |

**Supplementary Figure 8: Comparison of serine/threonine kinase activities in Rox1 treated with oxaliplatin.** Rox1 cells were seeded in 6-well plate and treated with 2  $\mu$ M of oxaliplatin during 45 minutes, 4 hours and 24 hours. The cells were lysed and 0.5  $\mu$ g of cellular protein were processed using the Pamgene kinase activity assay. The kinase activities of untreated and treated Rox1 cells were compared. The kinases presenting the strongest modifications after 45 minutes, 4 hours and 24 hours of treatment are presented in (A, B and C), respectively. A positive normalized kinase statistic indicates a kinase activity increased by oxaliplatin treatment.
